# Supplementary material
Source: publisher figshare collection journal article supplement (https://gsajournals.figshare.com/ndownloader/files/12349481)
Supplement: Supplementary file 1 [file 12349481]

## Sheet: Sheet1
Sleep Trait	Progenitor selection scheme	Progenitor replicate population	Source	d.f.	MS	F	P
Day avg. bout length CVE	long	1	sex	1	341.795	0.21	0.6586
Day avg. bout length CVE	long	1	line	9	2748.73	1.68	0.2261
Day avg. bout length CVE	long	1	sex×line	9	1637.26	0.83	0.5958
Day avg. bout length CVE	long	1	error	20	1968.67	--	--
Day avg. bout length CVE	long	2	sex	1	134.881	0.06	0.82
Day avg. bout length CVE	long	2	line	8	1328.76	0.54	0.7959
Day avg. bout length CVE	long	2	sex×line	8	2439.85	1.84	0.1338
Day avg. bout length CVE	long	2	error	18	1323.08	--	--
Day avg. bout length CVE	short	1	sex	1	559.886	0.27	0.6134
Day avg. bout length CVE	short	1	line	9	1991.73	0.97	0.5152
Day avg. bout length CVE	short	1	sex×line	9	2044.45	1.06	0.4315
Day avg. bout length CVE	short	1	error	20	1930.03	--	--
Day avg. bout length CVE	short	2	sex	1	4182.72	6.88	0.0277
Day avg. bout length CVE	short	2	line	9	433.197	0.71	0.6893
Day avg. bout length CVE	short	2	sex×line	9	608.178	0.84	0.5905
Day avg. bout length CVE	short	2	error	20	725.402	--	--
Night avg. bout length CVE	long	1	sex	1	4840.2	34.68	0.0002
Night avg. bout length CVE	long	1	line	9	369.146	2.65	0.0817
Night avg. bout length CVE	long	1	sex×line	9	139.554	1.56	0.1937
Night avg. bout length CVE	long	1	error	20	89.2801	--	--
Night avg. bout length CVE	long	2	sex	1	798.509	1.17	0.3117
Night avg. bout length CVE	long	2	line	8	895.791	1.31	0.3566
Night avg. bout length CVE	long	2	sex×line	8	684.839	1.49	0.2285
Night avg. bout length CVE	long	2	error	18	459.368	--	--
Night avg. bout length CVE	short	1	sex	1	24.6258	0.01	0.9129
Night avg. bout length CVE	short	1	line	9	1140.49	0.59	0.7807
Night avg. bout length CVE	short	1	sex×line	9	1945.44	1.38	0.2609
Night avg. bout length CVE	short	1	error	20	1409.23	--	--
Night avg. bout length CVE	short	2	sex	1	3798.41	1.28	0.2878
Night avg. bout length CVE	short	2	line	9	2308.76	0.78	0.6444
Night avg. bout length CVE	short	2	sex×line	9	2976.71	1.03	0.4539
Night avg. bout length CVE	short	2	error	20	2903.38	--	--
Day bout number CVE	long	1	sex	1	1448.3	26.76	0.0006
Day bout number CVE	long	1	line	9	67.4134	1.25	0.3745
Day bout number CVE	long	1	sex×line	9	54.1303	0.97	0.4886
Day bout number CVE	long	1	error	20	55.523	--	--
Day bout number CVE	long	2	sex	1	58.1425	1.73	0.2249
Day bout number CVE	long	2	line	8	47.6813	1.42	0.3163
Day bout number CVE	long	2	sex×line	8	33.6151	0.65	0.7256
Day bout number CVE	long	2	error	18	51.5749	--	--
Day bout number CVE	short	1	sex	1	1587.44	15.09	0.0037
Day bout number CVE	short	1	line	9	676.397	6.43	0.0053
Day bout number CVE	short	1	sex×line	9	105.186	1.34	0.2799
Day bout number CVE	short	1	error	20	78.6786	--	--
Day bout number CVE	short	2	sex	1	16175.9	79.33	<.0001
Day bout number CVE	short	2	line	9	957.731	4.7	0.0154
Day bout number CVE	short	2	sex×line	9	203.893	1.7	0.1537
Day bout number CVE	short	2	error	20	119.684	--	--
Night bout number CVE	long	1	sex	1	1.96291	0	0.9486
Night bout number CVE	long	1	line	9	271.155	0.61	0.7661
Night bout number CVE	long	1	sex×line	9	447.12	1.97	0.0987
Night bout number CVE	long	1	error	20	226.654	--	--
Night bout number CVE	long	2	sex	1	1909.86	5.34	0.0497
Night bout number CVE	long	2	line	8	238.741	0.67	0.71
Night bout number CVE	long	2	sex×line	8	357.953	2.92	0.0281
Night bout number CVE	long	2	error	18	122.539	--	--
Night bout number CVE	short	1	sex	1	1734.13	17.52	0.0024
Night bout number CVE	short	1	line	9	239.544	2.42	0.1021
Night bout number CVE	short	1	sex×line	9	99.0001	0.79	0.6255
Night bout number CVE	short	1	error	20	124.646	--	--
Night bout number CVE	short	2	sex	1	71.8851	0.09	0.7662
Night bout number CVE	short	2	line	9	1055.55	1.38	0.3196
Night bout number CVE	short	2	sex×line	9	764.987	2.02	0.0915
Night bout number CVE	short	2	error	20	378.832	--	--
24-hour sleep CVE	long	1	sex	1	367.684	299.1	<.0001
24-hour sleep CVE	long	1	line	9	7.67373	6.24	0.0059
24-hour sleep CVE	long	1	sex×line	9	1.2293	0.26	0.9787
24-hour sleep CVE	long	1	error	20	4.73485	--	--
24-hour sleep CVE	long	2	sex	1	35.1036	29.78	0.0006
24-hour sleep CVE	long	2	line	8	27.025	22.93	<.0001
24-hour sleep CVE	long	2	sex×line	8	1.17878	0.11	0.9985
24-hour sleep CVE	long	2	error	18	11.1376	--	--
24-hour sleep CVE	short	1	sex	1	38.3936	1.07	0.3285
24-hour sleep CVE	short	1	line	9	601.757	16.73	0.0001
24-hour sleep CVE	short	1	sex×line	9	35.9748	0.35	0.9458
24-hour sleep CVE	short	1	error	20	102.784	--	--
24-hour sleep CVE	short	2	sex	1	7645.22	17.69	0.0023
24-hour sleep CVE	short	2	line	9	743.655	1.72	0.2157
24-hour sleep CVE	short	2	sex×line	9	432.263	1.01	0.4656
24-hour sleep CVE	short	2	error	20	428.843	--	--
Day sleep CVE	long	1	sex	1	2736.4	105.22	<.0001
Day sleep CVE	long	1	line	9	41.1632	1.58	0.2523
Day sleep CVE	long	1	sex×line	9	26.0053	0.84	0.5913
Day sleep CVE	long	1	error	20	31.0533	--	--
Day sleep CVE	long	2	sex	1	592.718	42.23	0.0002
Day sleep CVE	long	2	line	8	113.302	8.07	0.0039
Day sleep CVE	long	2	sex×line	8	14.0358	0.38	0.9179
Day sleep CVE	long	2	error	18	37.0005	--	--
Day sleep CVE	short	1	sex	1	2504.92	40.39	0.0001
Day sleep CVE	short	1	line	9	1378.94	22.24	<.0001
Day sleep CVE	short	1	sex×line	9	62.0132	0.46	0.8819
Day sleep CVE	short	1	error	20	133.741	--	--
Day sleep CVE	short	2	sex	1	18119.9	170.65	<.0001
Day sleep CVE	short	2	line	9	836.215	7.88	0.0026
Day sleep CVE	short	2	sex×line	9	106.183	0.45	0.8925
Day sleep CVE	short	2	error	20	237.423	--	--
Sleep latency CVE	long	1	sex	1	418.339	1.02	0.3386
Sleep latency CVE	long	1	line	9	219.156	0.53	0.8174
Sleep latency CVE	long	1	sex×line	9	409.684	1.69	0.1579
Sleep latency CVE	long	1	error	20	242.804	--	--
Sleep latency CVE	long	2	sex	1	1742.53	3.85	0.0853
Sleep latency CVE	long	2	line	8	676.302	1.5	0.2913
Sleep latency CVE	long	2	sex×line	8	452.314	0.92	0.526
Sleep latency CVE	long	2	error	18	494.084	--	--
Sleep latency CVE	short	1	sex	1	1734	3.53	0.0929
Sleep latency CVE	short	1	line	9	272.379	0.55	0.8034
Sleep latency CVE	short	1	sex×line	9	491.069	2.35	0.0539
Sleep latency CVE	short	1	error	20	209.297	--	--
Sleep latency CVE	short	2	sex	1	2319.54	20.57	0.0014
Sleep latency CVE	short	2	line	9	177.726	1.58	0.2542
Sleep latency CVE	short	2	sex×line	9	112.736	0.84	0.5885
Sleep latency CVE	short	2	error	20	134.066	--	--
Night sleep CVE	long	1	sex	1	88.7184	35.61	0.0002
Night sleep CVE	long	1	line	9	8.1613	3.28	0.046
Night sleep CVE	long	1	sex×line	9	2.49167	0.69	0.7105
Night sleep CVE	long	1	error	20	3.61489	--	--
Night sleep CVE	long	2	sex	1	0.403258	0.02	0.8894
Night sleep CVE	long	2	line	8	33.6662	1.72	0.23
Night sleep CVE	long	2	sex×line	8	19.5759	1.22	0.341
Night sleep CVE	long	2	error	18	16.011	--	--
Night sleep CVE	short	1	sex	1	2037.23	30.58	0.0004
Night sleep CVE	short	1	line	9	680.951	10.22	0.001
Night sleep CVE	short	1	sex×line	9	66.6203	0.48	0.873
Night sleep CVE	short	1	error	20	139.624	--	--
Night sleep CVE	short	2	sex	1	99.7636	0.08	0.786
Night sleep CVE	short	2	line	9	828.6	0.65	0.7343
Night sleep CVE	short	2	sex×line	9	1274.49	1.57	0.1925
Night sleep CVE	short	2	error	20	813.411	--	--
Waking activity CVE	long	1	sex	1	214.742	11.3	0.0084
Waking activity CVE	long	1	line	9	21.6074	1.14	0.4255
Waking activity CVE	long	1	sex×line	9	18.9957	0.38	0.9298
Waking activity CVE	long	1	error	20	49.647	--	--
Waking activity CVE	long	2	sex	1	265.894	1.28	0.2906
Waking activity CVE	long	2	line	8	110.602	0.53	0.8043
Waking activity CVE	long	2	sex×line	8	207.707	3.16	0.0204
Waking activity CVE	long	2	error	18	65.7958	--	--
Waking activity CVE	short	1	sex	1	0.214313	0.01	0.9437
Waking activity CVE	short	1	line	9	114.835	2.83	0.0688
Waking activity CVE	short	1	sex×line	9	40.6243	0.98	0.4853
Waking activity CVE	short	1	error	20	41.4735	--	--
Waking activity CVE	short	2	sex	1	18.1684	0.46	0.5167
Waking activity CVE	short	2	line	9	28.4273	0.71	0.6889
Waking activity CVE	short	2	sex×line	9	39.8827	0.98	0.4882
Waking activity CVE	short	2	error	20	40.8883	--	--
